# Supplementary material
Source: Research Square preprint supplement (doi:10.21203/rs.3.rs-9023216/v1)
Supplement: Supplementary file 1 [file 2f286fd5deb5c18c5c1a0087.docx]

**Tables**

**Table 1** Demographic characteristics of the population samples

| Chi-square / T | Arab women | | Bedouin Arab women | |  |
| --- | --- | --- | --- | --- | --- |
| *M* / *N* | *SD* (%) | *M* / *N* | *SD* (%) |
| -4.15*** | 26.6 | 6.1 | 30.38 | 7.84 | Age |
| 27.136*** |  |  |  |  | Marital status |
|  | 101 | 67.8 | 38 | 36.2 | Single (never married) |
|  | 11 | 7.4 | 11 | 10.5 | Married |
|  | 33 | 22.1 | 52 | 49.5 | Divorced |
|  | 1 | 0.7 | 0 | 0 | Widowed |
|  | 3 | 2 | 4 | 3.8 | Separated |
| 5.738 |  |  |  |  | Education level |
|  | 8 | 5.4 | 7 | 6.6 | Diploma |
|  | 112 | 75.2 | 75 | 71.4 | Bachelor’s degree |
|  | 26 | 17.4 | 22 | 21 | Master's degree |
|  | 3 | 2 | 1 | 1 | Ph.D. |
| 3.263 |  |  |  |  | Income |
|  | 67 | 45 | 38 | 41.3 | Far below average |
|  | 38 | 25.4 | 29 | 26.4 | Below average |
|  | 11 | 7.4 | 12 | 9.1 | Average |
|  | 25 | 16.8 | 22 | 18.5 | Above average |
|  | 8 | 5.4 | 4 | 4.7 | Far above average |
| 0.807 |  |  |  |  | Current job related to the field in which they trained? |
|  | 89 | 59.7 | 68 | 64.8 | Yes |
|  | 30 | 20.2 | 17 | 16.2 | Partially |
|  | 30 | 20.1 | 20 | 19 | No |
| 1.882 |  |  |  |  | Work environment |
|  | 27 | 18.1 | 14 | 13.3 | Includes only Arab/Bedouin Arab individuals |
|  | 20 | 13.4 | 14 | 13.3 | The majority are Arab/Bedouin Arab. |
|  | 69 | 46.3 | 49 | 46.7 | Some workers are Arab/Bedouin Arab and some are not. |
|  | 25 | 16.8 | 19 | 18.1 | Most of the workers are not Arab/Bedouin Arab. |
|  | 8 | 5.4 | 9 | 8.6 | I am the only one who is Arab/Bedouin Arab. |
| -3.9*** | 2.5 | 3.06 | 4.72 | 6.12 | Seniority at work (years) |

****p* < 0.001.

**Table 2** Differences between Arab women and Bedouin Arab women, in terms of SOC, family quality of life, inclusive management, CSOC, diversity climate, and well-being

| *t*-value | Bedouin Arab women  (*N* = 105) | | General Arab women  (*N* = 149) | | Variable |
| --- | --- | --- | --- | --- | --- |
|  | *SD* | *M* | *SD* | *M* |
| -1.01 | 0.82 | 4.70 | 0.90 | 4.60 | Individual circle – SOC (1–7) |
| *2.50 | 0.83 | 3.60 | 0.75 | 3.48 | Microsystem – Family quality of life (1–5) |
| -0.90 | 0.80 | 3.93 | 0.80 | 3.84 | Microsystem – Inclusive management (1–5) |
| -3.8*** | 0.88 | 4.02 | 0.80 | 3.61 | Exosystem – CSOC (1–7) |
| 0.57 | 0.70 | 4.02 | 0.65 | 4.07 | Exosystem – Diversity climate (1–4) |
| 1.80 | | 0.83 | 3.60 | 0.75 | 2.50 | Well-being (1–5) |

**p* < 0.05. ****p* < 0.001.

**Table 3** Correlations between the study variables (*N* = 254)

| 6 | 5 | 4 | 3 | 2 | 1 |  |
| --- | --- | --- | --- | --- | --- | --- |
|  |  |  |  |  | ___ | 1. Individual circle – SOC |
|  |  |  |  | ____ | .31** | 2. Microsystem – Family quality of life |
|  |  |  | ___ | .20** | .41*** | 3. Microsystem – Inclusive management |
|  |  | ___ | .30*** | .43*** | .42** | 4. CSOC |
|  | ___ | .20*** | .70*** | .23*** | .4*** | 5. Exosystem – Diversity climate |
| ___ | .30*** | .30*** | .30*** | .40*** | .52*** | 6. Well-being |

***p* < 0.01. ****p* < 0.001.

**Table 4** Hierarchical linear model of the roles of demographic factors, SOC, family quality of life, inclusive management, CSOC, diversity climate in the explanation of well-being

|  | **Well-being** | | | | | |
| --- | --- | --- | --- | --- | --- | --- |
|  | ***R*2** | ***B*** | ***SE*** | **β** | ***t*** | ***p*-value** |
| **Step 1** | 0.040 |  |  |  |  |  |
| Age |  | -0.002 | 0.010 | -0.023 | -0.239 | 0.811 |
| Marital status |  | -0.013 | 0.051 | -0.019 | -0.257 | 0.798 |
| Income |  | 0.080 | 0.061 | 0.093 | 1.317 | 0.189 |
| Seniority at work |  | 0.020 | 0.013 | 0.128 | 1.475 | 0.141 |
| Minority group |  | -0.201 | 0.097 | -0.137 | -2.071* | 0.039 |
| **Step 2** | 0.171 |  |  |  |  |  |
| Age |  | 0.004 | 0.009 | 0.037 | 0.413 | 0.680 |
| Marital status |  | -0.030 | 0.048 | -0.044 | -0.623 | 0.534 |
| Income |  | 0.052 | 0.057 | 0.060 | 0.912 | 0.363 |
| Seniority at work |  | 0.011 | 0.013 | 0.071 | 0.869 | 0.386 |
| Minority group |  | -0.239 | 0.090 | -0.162 | -2.641** | 0.009 |
| SOC |  | 0.488 | 0.078 | 0.369 | 6.257*** | 0.000 |
| **Step 3** | 0.267 |  |  |  |  |  |
| Age |  | 0.002 | 0.009 | 0.016 | 0.186 | 0.852 |
| Marital status |  | -0.006 | 0.045 | -0.009 | -0.136 | 0.892 |
| Income |  | 0.058 | 0.053 | 0.068 | 1.086 | 0.278 |
| Seniority at work |  | 0.014 | 0.012 | 0.088 | 1.138 | 0.256 |
| Minority group |  | -0.170 | 0.086 | -0.115 | -1.965 | 0.051 |
| SOC |  | 0.375 | 0.078 | 0.283 | 4.799*** | 0.000 |
| Inclusive management |  | 0.269 | 0.053 | 0.295 | 5.126*** | 0.000 |
| Family quality of life |  | 0.113 | 0.078 | 0.086 | 1.453 | 0.148 |
| **Step 4** | 0.282 |  |  |  |  |  |
| Age |  | 0.001 | 0.009 | 0.014 | 0.163 | 0.871 |
| Marital status |  | -0.003 | 0.045 | -0.004 | -0.059 | 0.953 |
| Income |  | 0.050 | 0.054 | 0.058 | 0.924 | 0.356 |
| Seniority at work |  | 0.015 | 0.012 | 0.096 | 1.244 | 0.215 |
| minority group |  | -0.160 | 0.087 | -0.109 | -1.838 | 0.067 |
| SOC |  | 0.373 | 0.078 | 0.281 | 4.763*** | 0.000 |
| Inclusive management |  | 0.297 | 0.057 | 0.325 | 5.241*** | 0.000 |
| Family quality of life |  | 0.198 | 0.098 | 0.150 | 2.027* | 0.044 |
| CSOC |  | -0.059 | 0.085 | -0.042 | -0.697 | 0.486 |
| Diversity climate |  | -0.092 | 0.069 | -0.097 | -1.343 | 0.181 |
| **Step 5** | 0.102 |  |  |  |  |  |
| Group × SOC |  | 0.077 | 0.045 | 0.258 | 1.704 | 0.090 |
| Group × Family quality of life |  | 0.184 | 0.041 | 0.519 | 4.511*** | 0.000 |
| Group × Inclusive management |  | 0.065 | 0.071 | 0.159 | 0.914 | 0.361 |
| Group × CSOC |  | -0.205 | 0.052 | -0.617 | -3.959*** | 0.000 |
| Group × Diversity climate |  | -0.092 | 0.049 | -0.292 | -1.867 | 0.063 |

**p* < 0.05. ***p* < 0.01. ****p* < 0.001.
